# Supplementary material for: Coronary Event Risk Test (CERT) as Risk Predictor for the 10-Year Clinical Outcome of Patients with Peripheral Artery Disease
Source: Preprints.org preprint supplement (doi:10.20944/preprints202307.1966.v1), 2023-07-28
Supplement: Supplementary file 1 [file supplementary]

**Supplemental Data**

**
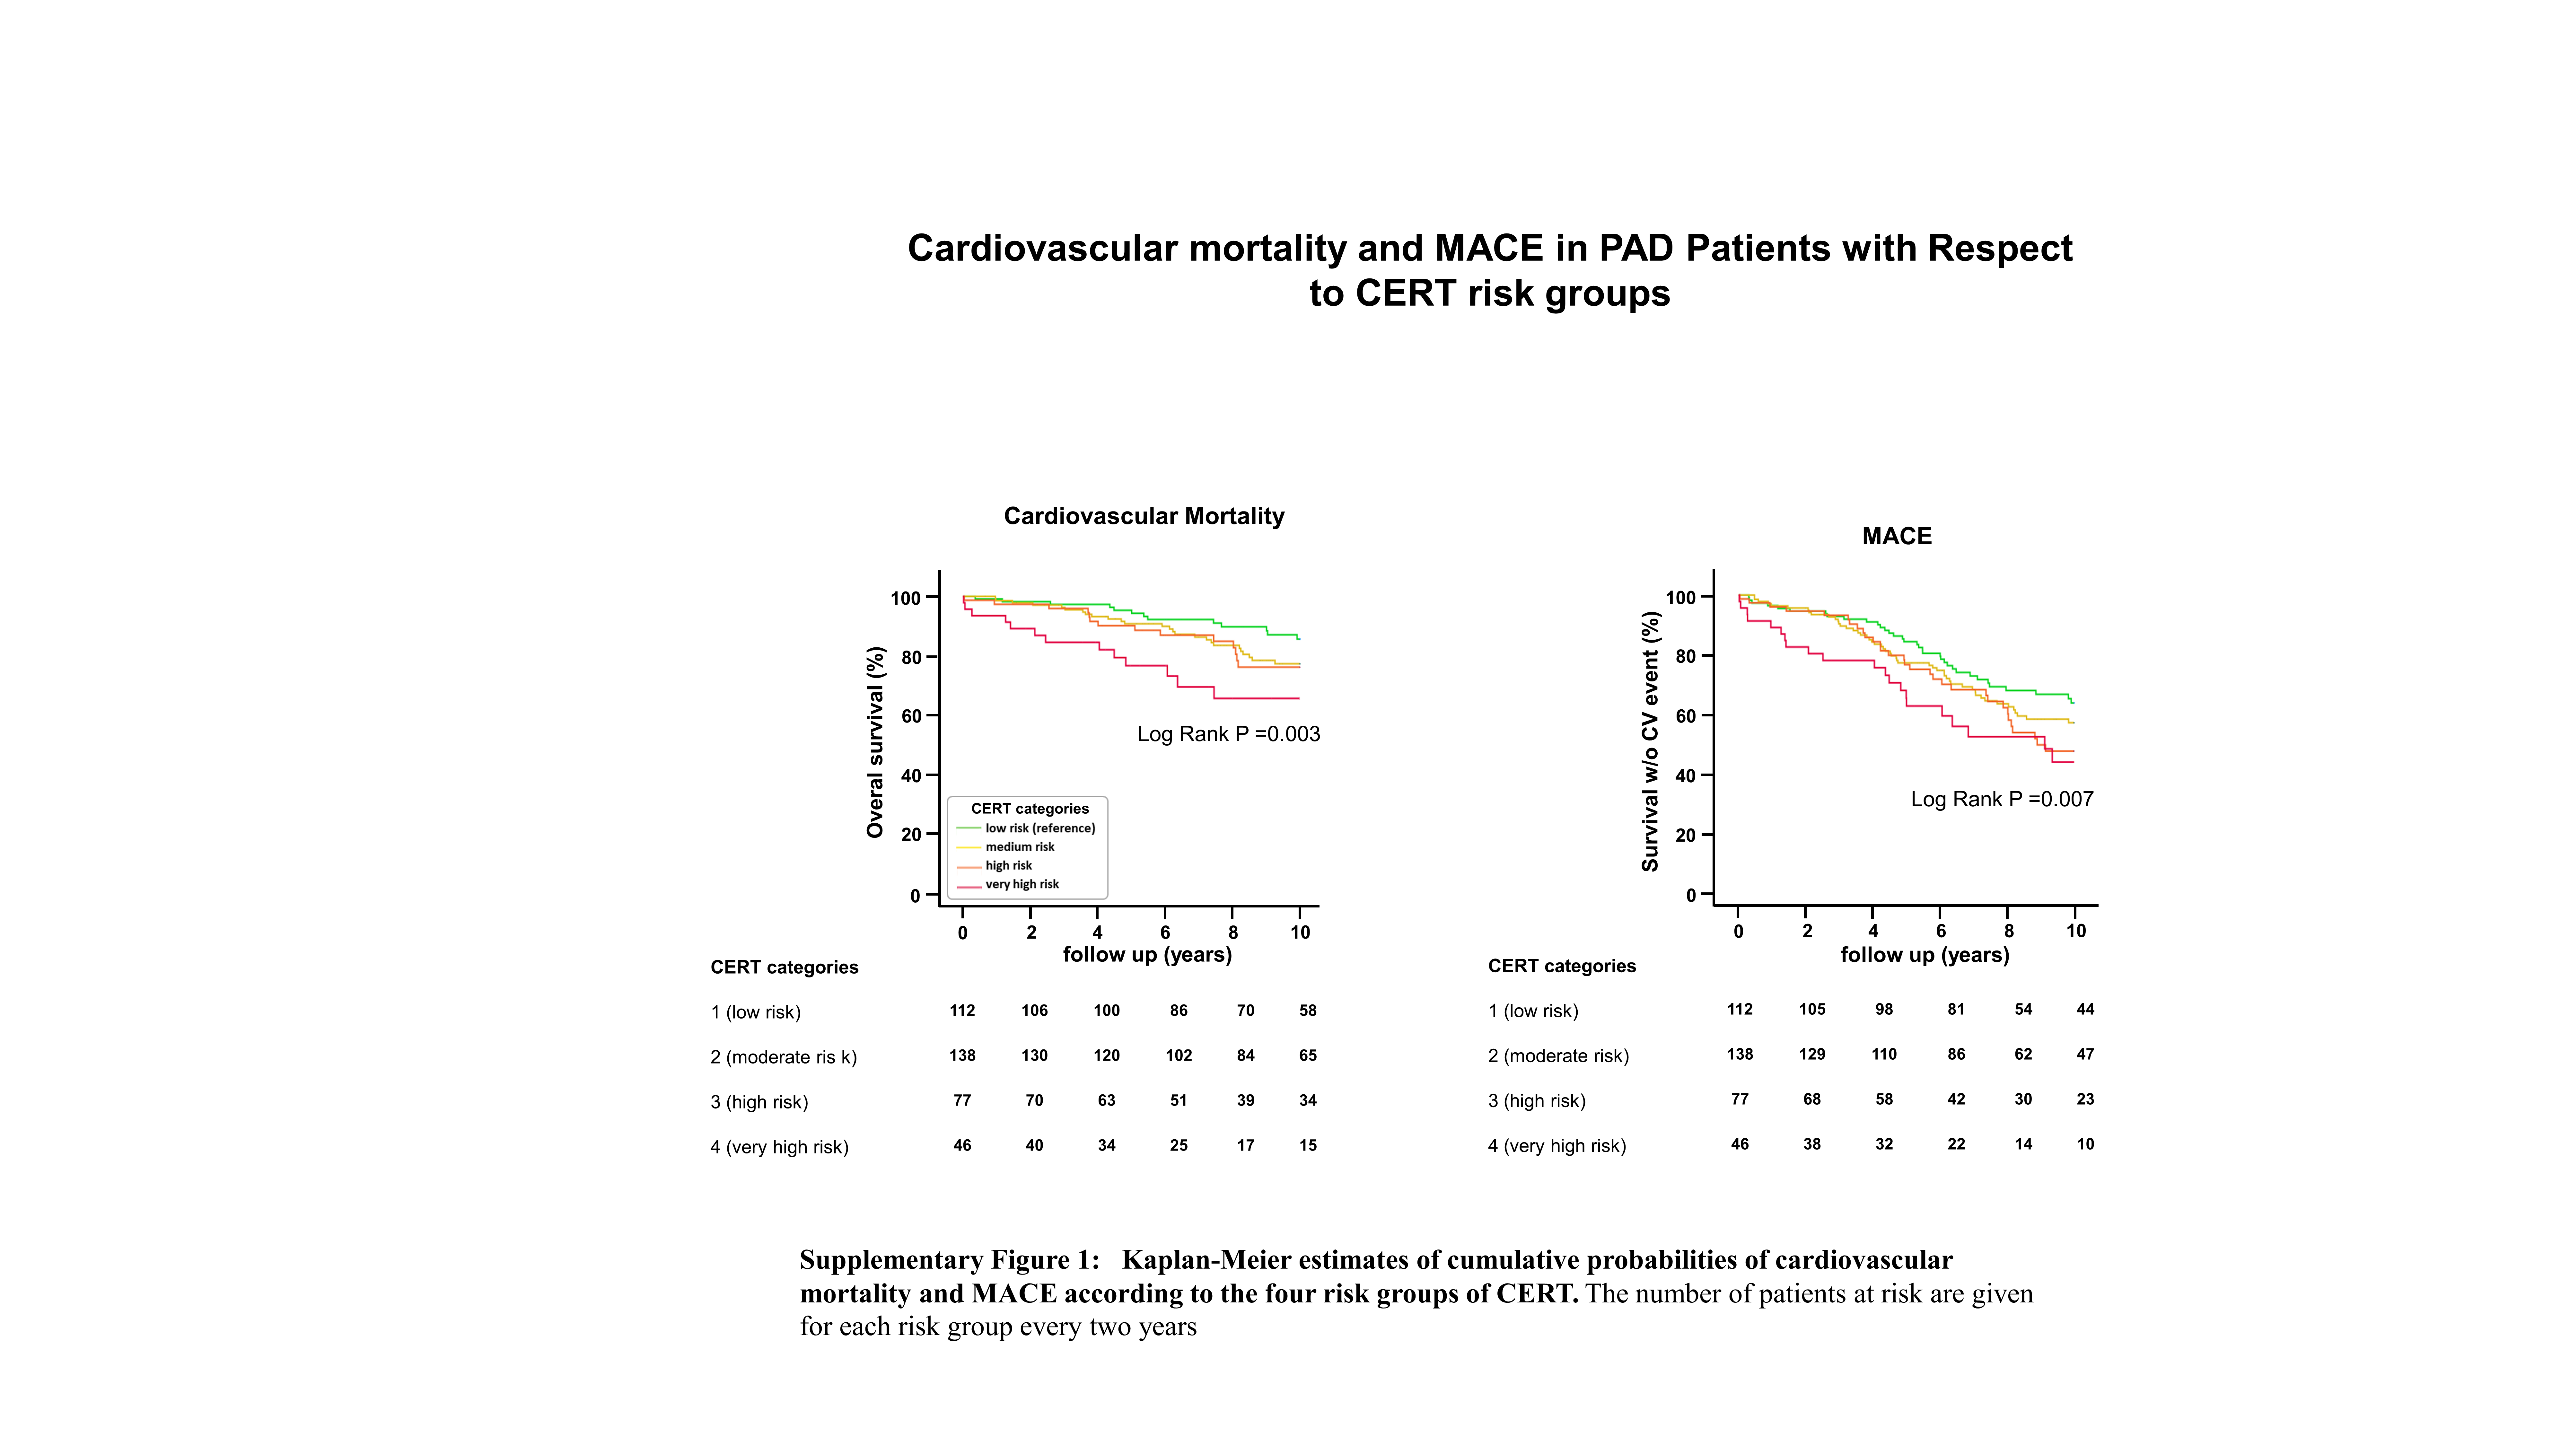
**

**Supplementary Figure 1: Cardiovascular mortality and MACE in PAD Patients with Respect to CERT risk groups.** Kaplan-Meier estimates of cumulative probabilities of cardiovascular mortality and MACE are depicted according to the four risk groups of CERT. The number of patients at risk is given for each risk group every two years


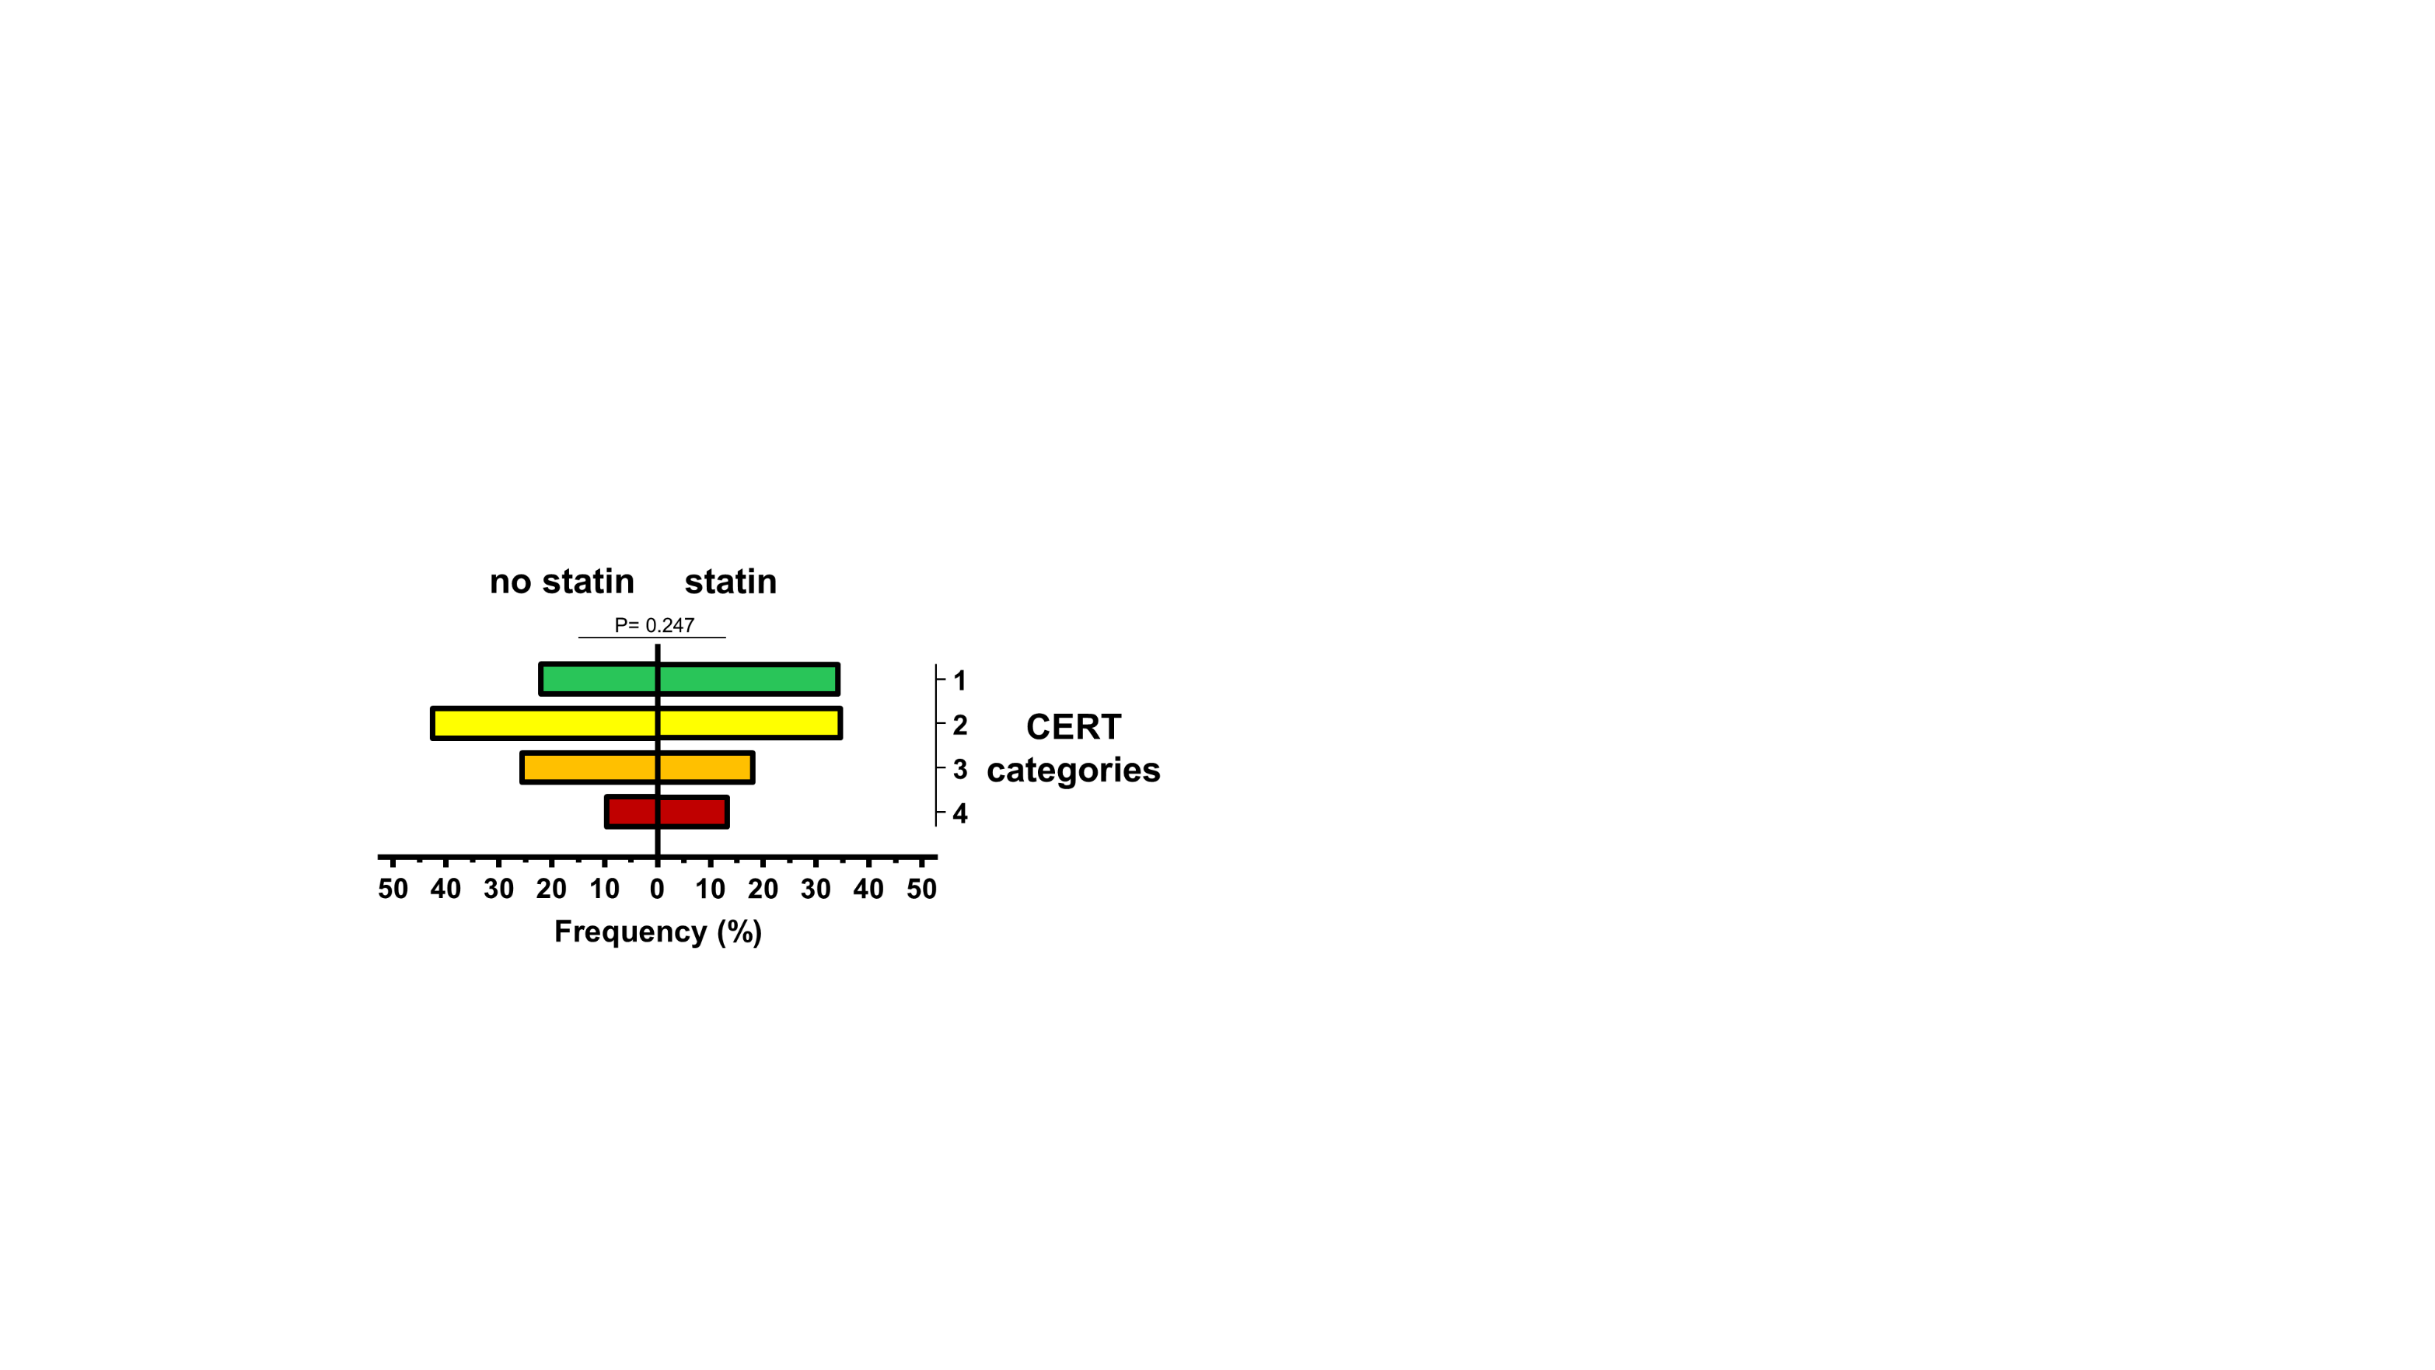


**Supplementary Figure 2: Frequency of CERT risk categories in patients with respect to their pre-baseline treatment status with statins.** P-value was calculated according to the Mantel-Haenszel test of trend.

***Supplementary Table 1.***

| **Ceramides** | **Q1 (M+HCOO)- (m/z)** | **Q1 (M+HCOO)- (m/z)** | **Collision energy** | **Internal standard** |
| --- | --- | --- | --- | --- |
| 18:1/16:0 | 538.5 | 264.25 | 40 | 18:1/16:0 – d4 |
| 18:1/18:0 | 566.5 | 264.25 | 40 | 18:1/18:0 – d4 |
| 18:1/24:0 | 650.6 | 264.25 | 40 | 18:1/24:0 – d4 |
| 18:1/24:1 | 648.6 | 264.25 | 40 | 18:1/24:1 – d4 |

**Lipids and their respective ions used in the study.**
